# Supplementary material for: Improving and Comparing Probiotic Plate Count Methods by Analytical Procedure Lifecycle Management
Source: PubMed Central journal article supplement (PMC8312684; doi:10.3389/fmicb.2021.693066), 2021-07-12
Supplement: Data_Sheet_2.pdf [file Data_Sheet_2.pdf]

## Appendix 2: Equations and MS EXCEL Formulas

### Equation Symbols:

For the purposes of this paper, the following symbols apply.

|           |                                                                       |
|-----------|-----------------------------------------------------------------------|
| $\bar{C}$ | average for one condition                                             |
| $h$       | the index of the condition ( $h = 1, 2, \dots, N$ )                   |
| $i$       | the index of the replicate ( $i = 1, 2, \dots, r$ )                   |
| $j$       | the index of the plate ( $j = 1, 2, \dots, p$ )                       |
| $k$       | coverage factor                                                       |
| $K$       | tolerance interval factor                                             |
| $n$       | number of values used to calculate $\bar{Y}$                          |
| $N$       | number of conditions                                                  |
| $p$       | number of plates in each replicate                                    |
| $P$       | desired probability value                                             |
| $pr$      | acceptable probability of making a wrong decision                     |
| $r$       | number of replicates in each condition                                |
| $S_C$     | standard deviation for one condition                                  |
| $S_C^2$   | variance for one condition                                            |
| $S_{IP}$  | pooled standard deviation for all conditions (intermediate precision) |
| $S_{p1}$  | standard deviation for one plate count                                |

|                       |                                                                                                                                                                                                                                      |
|-----------------------|--------------------------------------------------------------------------------------------------------------------------------------------------------------------------------------------------------------------------------------|
| $S_{p3}$              | standard error of the mean for average of three plate counts                                                                                                                                                                         |
| $S_{PREP}$            | standard deviation for sample preparation                                                                                                                                                                                            |
| $TI$                  | tolerance interval                                                                                                                                                                                                                   |
| $TMU$                 | target measurement uncertainty                                                                                                                                                                                                       |
| $U$                   | expanded uncertainty                                                                                                                                                                                                                 |
| $\chi^2_{\alpha;n-1}$ | a chi-squared percentile with area $\alpha$ to the left and $(n-1)$ degrees of freedom can be found in tables available online ( <a href="https://www.itl.nist.gov/div898/handbook/">https://www.itl.nist.gov/div898/handbook/</a> ) |
| $y$                   | one plate count                                                                                                                                                                                                                      |
| $\bar{y}$             | average of plate counts for one replicate                                                                                                                                                                                            |
| $\bar{Y}$             | average value used to calculate the tolerance interval                                                                                                                                                                               |
| $Z^2_{(1+P)/2}$       | the square of the standard normal percentile with area $(1 + P)/2$ to the left                                                                                                                                                       |

### **TMU EQUATION**

Equation 1 
$$TMU = U/k_{pr}$$
 (Burgess et al., 2016)

### **MS EXCEL Formula for Determining the Probability of Being Wrong**

The probability that a reportable value will be less than the  $TMU$  can be calculated using the NORM.DIST function in EXCEL. The  $TMU$  in the function is varied until the desired probability is achieved. This probability is the acceptable probability of being wrong from the decision rule. For  $TMU$  with a lower limit, only, the formula is:

Equation 2 
$$=NORM.DIST(\text{lower limit}, X, TMU, TRUE)$$

The lower limit is the value of the specification at the low limit.  
X is the mean, the center, or mid-point of the distribution.

The value of the TMU is varied until the formula returns the desired probability below the lower limit.

TRUE returns the cumulative distribution function.

## ANOVA EQUATIONS

There are  $N$  conditions. For each condition, there are  $r$  replicates with  $p_j$  ( $j=1, 2, \dots, p$ ) plate counts for replicate  $i$ , resulting in  $y_j \log_{10}$  CFU/g for plate count  $j$  of replicate  $i$ .

In the *Lactobacillus* spp. example, there are four conditions ( $N=4$ ) with 10 replicates per condition ( $r=10$  or  $r_i$  where each replicate is indicated by  $i=1, 2, 3, \dots, 10$ ). Each replicate is plated in triplicate ( $p=3$ ) and each plate is identified as  $j=1, 2$ , or  $3$ .

### Average of plate counts for one replicate

To calculate the average of plate counts for one replicate associated with the *Lactobacillus* spp. example in this paper, the following caveats apply:

1. Data includes at least about 20 sets of replicates (e.g., 20 sets of triplicate plate counts).
2. The data covers a small range (small is  $<$  an order of magnitude).
3. The data variability is similar (small is  $<$  order of magnitude).

Equation 3

$$\bar{y} = \frac{\sum_{j=1}^p y_j}{p}$$

### Average for one condition

Equation 4

$$\bar{C}_h = \frac{\sum_{i=1}^r \bar{y}_i}{r}$$

### Standard deviation for one condition

Equation 5

$$S_C = \sqrt{\frac{\sum_{i=1}^r (\bar{y}_i - C_h)^2}{r - 1}}$$

### Variance for one condition

Equation 6  $S_C^2$

### Pooled standard deviation for all conditions (Intermediate precision)

Equation 7 
$$S_{IP} = \sqrt{\frac{\sum_{h=1}^N (n_h - 1) \times S_C^2}{\sum_{h=1}^N (n_h - 1)}}$$

### Average plate count for one replicate

Equation 8 
$$\bar{y}_i = \frac{\sum_{j=1}^{p_i} y_{ij}}{p_i}$$

### Standard deviation for a one plate count based on all replicates in all conditions ( $p = 40$ )

Equation 9 
$$S_{p1} = \sqrt{\frac{\sum_{h=1}^N \sum_{i=1}^r (y_{ij} - \bar{y}_i)^2}{p}}$$

### Standard error of the mean for the average of three plate counts ( $p = 3$ )

Equation 10 
$$S_{p3} = \frac{S_{p1}}{\sqrt{p}}$$

### Standard deviation for sample preparation

Equation 11 
$$S_{PREP} = \sqrt{S_{IP}^2 - S_{p3}^2}$$

## ***TI* EQUATIONS**

Equation 12

$$TI = \bar{C} \pm (K \times S_c)$$

Equation 13

$$K = \sqrt{\frac{Z_{(1+P)/2}^2 \times (r - 1)}{\chi_{\alpha:r-1}^2}} \times \left(1 + \frac{1}{r}\right)$$
