# Supplementary material for: Improving and Comparing Probiotic Plate Count Methods by Analytical Procedure Lifecycle Management
Source: PubMed Central journal article supplement (PMC8312684; doi:10.3389/fmicb.2021.693066), 2021-07-12
Supplement: Data_Sheet_3.pdf [file Data_Sheet_3.pdf]

### **Appendix 3: Risk analysis for CFU analytical procedures and for the Example *Lactobacillus* spp.**

This appendix is intended to be a guide for identifying potential risks, their potential impacts on the reportable value and performance, and control strategies that apply to analytical CFU procedures. The risks are listed and grouped according to the ISO categories (technical, matrix, and distributional), which are defined in standard 19036:2019 (ISO, 2019). Due to limited number of CFU or proliferation-based reference standards with assigned, certified, or reference values available, measurement and evaluation of the accuracy (or bias) of a CFU procedure has not been included. However, variables in the procedure may still affect the accuracy of the measurement. Possible mitigation strategies are given to further describe the risks and to address how they can be controlled.

The table includes risk information that is applied to CFU procedures, in general, and specifically to the *Lactobacillus* spp. example. The table applies to a bulk product. Although many of the risks in the table would be applicable to a finished product and/or other matrices, additional risk components may be recognized and included. The analytical procedure for the example, and therefore the risks included in the table, was based on a fully developed USP monograph that included instructions based on the submitting company's practices. The right-hand columns of the table contain risks and controls that apply specifically to the *Lactobacillus* spp. example. There is also a column indicating whether the risk was included in the example ANOVA study. Although the risks associated with analytical CFU procedures were examined in detail, this table is not comprehensive. The user may encounter risks that have not been included in the table or may find that not all listed risks are applicable to the analytical procedure being investigated. The reader is encouraged to use this table as a guide when identifying potential risks for a specific CFU enumeration procedure.

| Risk or Uncertainty Component                   | Impact                | Details of the Risk                                                                                                                                             | Mitigation Strategy                                        | Assessment for <i>Lactobacillus</i> spp. Example                                                                                           | Include in <i>Lactobacillus</i> spp. ANOVA study?                                            |
|-------------------------------------------------|-----------------------|-----------------------------------------------------------------------------------------------------------------------------------------------------------------|------------------------------------------------------------|--------------------------------------------------------------------------------------------------------------------------------------------|----------------------------------------------------------------------------------------------|
| <b>ISO Risk Category<sup>a</sup>: Technical</b> |                       |                                                                                                                                                                 |                                                            |                                                                                                                                            |                                                                                              |
| Analyst                                         | Accuracy<br>Precision | Variability in carrying out the procedure                                                                                                                       | Competent analysts with education and training to meet GMP | Company analysts meet GMP expectations                                                                                                     | Yes<br><br>Different analysts included                                                       |
| Day-to-day variation                            | Accuracy<br>Precision | Between day variability can be significant due to climate changes, equipment performance, different reagent lots, and sample stability                          | Meets GMP                                                  | Meets GMP                                                                                                                                  | Yes<br><br>Procedure conducted on different days                                             |
| Procedure                                       | Accuracy<br>Precision | If options or variations are allowed in the procedure, there are work instructions that describes when specific variations can be used and how they are applied | Written instructions are clear and supported by data       | The laboratory procedure has been clearly written to provide the instructions required to follow company practices and steps that may vary | No<br><br>The company procedure is self-explanatory and will be followed for each experiment |

|                                                                         |                               |                                                                                                                                                                                                                                                                                                   |                                                                                                                                                                                  |                                                                                                                                                           |                                                                          |
|-------------------------------------------------------------------------|-------------------------------|---------------------------------------------------------------------------------------------------------------------------------------------------------------------------------------------------------------------------------------------------------------------------------------------------|----------------------------------------------------------------------------------------------------------------------------------------------------------------------------------|-----------------------------------------------------------------------------------------------------------------------------------------------------------|--------------------------------------------------------------------------|
| <p>Use of the analytical procedure over a long period of time</p>       | <p>Accuracy<br/>Precision</p> | <p>Laboratory conditions can vary over a year and impact procedure performance</p>                                                                                                                                                                                                                | <p>Monitor results with trend analysis and use control charts whenever possible</p> <p>Use of trends and charts is part of continued verification (Stage 3 in the Lifecycle)</p> | <p>Use control chart for triplicate plate results</p> <p>Track reportable values</p>                                                                      | <p>No</p> <p>ANOVA experiments are conducted over short time periods</p> |
| <p>Plating practices/Selection of plating technique</p>                 | <p>Accuracy<br/>Precision</p> | <p>Variation in growth can be observed between pour (single and/or double layer) and surface plating depending on the oxygen tolerance of the species being cultivated</p> <p>Use of membrane filters can lower counts</p> <p>Agar quality (composition, wetness, lumps, etc.) affects counts</p> | <p>Use of scientific and expertise knowledge, experience, and specific instructions</p> <p>Implement a quality control program for all media used in enumeration procedures</p>  | <p>The plating technique, including acceptable quality of agar to be used, is described in the company procedure</p> <p>Control programs are in place</p> | <p>No</p>                                                                |
| <p>Selection of suspension/rehydration, diluting, and plating media</p> | <p>Accuracy<br/>Precision</p> | <p>Composition of the media should maintain viability and/or support ability to culture microorganisms in the product</p>                                                                                                                                                                         | <p>Use of scientific knowledge, expertise, experience, and specific instructions</p>                                                                                             | <p>The media are specified in the procedure and have been validated for use with the powder</p>                                                           | <p>No</p>                                                                |

|                                                                                                                        |                       |                                                                                                                                             |                                                                                          |                                                                     |                                                                                            |
|------------------------------------------------------------------------------------------------------------------------|-----------------------|---------------------------------------------------------------------------------------------------------------------------------------------|------------------------------------------------------------------------------------------|---------------------------------------------------------------------|--------------------------------------------------------------------------------------------|
| Ingredient from unqualified or alternative qualified source used in suspension/rehydration, diluting, or plating media | Accuracy<br>Precision | Impact on total CFU counts                                                                                                                  | Ingredient sources are qualified by R&D during procedure development                     | The source of ingredients is specified in the company procedure     | Yes<br><br>Different sources of ingredient will be included in lots used for ANOVA studies |
| Incorrect ingredient for various media listed in SOP/work instruction for culture medium                               | Accuracy<br>Precision | Impact on total CFU counts                                                                                                                  | Multiple people check the documentation of procedures during reviews leading to approval | The ingredients listed in the company procedure are correct         | No                                                                                         |
| Ingredient measured incorrectly when making media                                                                      | Accuracy<br>Precision | Impact on total CFU counts                                                                                                                  | Analysts are trained in media production to meet GMP                                     | The company's analysts have been trained to make media              | No                                                                                         |
| Shelf life of suspension, dilution, and plating media                                                                  | Accuracy<br>Precision | Storage conditions (e.g., time and temperature) for all media used can affect the overall ability of the procedure to support CFU formation | Control shelf-life<br><br>Storage conditions can be defined based on shelf-life studies  | Shelf life of all media involved in the procedure have been defined | No                                                                                         |
| pH all media used in the procedure                                                                                     | Accuracy<br>Precision | Media pH can influence the overall ability of the procedure to support CFU formation                                                        | Determine optimum pH during procedure development and adjust media                       | pH is defined for media used in the procedure                       | Yes<br><br>The company has two pH meters, which will be used during media                  |

|                                      |                           |                                                                                                                |                                                                                                                                                                           |                                                                                        |                                                            |
|--------------------------------------|---------------------------|----------------------------------------------------------------------------------------------------------------|---------------------------------------------------------------------------------------------------------------------------------------------------------------------------|----------------------------------------------------------------------------------------|------------------------------------------------------------|
|                                      |                           | Optimum pH for media can be strain dependent                                                                   | production lots accordingly<br><br>Use a multi-point calibrated pH meters when adjusting<br><br>Ensure instrument calibration and analyst training meets GMP expectations | pH meters are calibrated<br><br>The calibration technique clearly described in and SOP | production for the study                                   |
| Autoclave                            | Accuracy<br><br>Precision | Contamination not inactivated<br><br>Media components destroyed or inactivated                                 | To meet GMP, specify autoclave load, configuration for input (e.g., flasks, test tubes), define times and temperatures, etc.                                              | Conditions for autoclaving are defined for the media in this study                     | Yes<br><br>Different autoclaves are used                   |
| Balance                              | Accuracy<br><br>Precision | Balance not calibrated<br><br>Incorrect amount taken                                                           | Detailed instructions for balance verification and analyst training meet GMP                                                                                              | Meets GMP                                                                              | Yes<br><br>Different balances are used                     |
| Pipettes – volumetric or serological | Accuracy<br><br>Precision | Incorrect volumes used in media preparation, sample preparation, suspension/rehydration, dilution, and plating | Meet GMP by supporting the maintenance and calibration of pipettes per                                                                                                    | The company uses disposable serological pipettes that are confirmed accurate by        | Yes<br><br>Different lots of serological pipettes are used |

|                     |                                  |                                                                                                                       |                                                                                                                                                                                                  |                                                                                                               |                                                                                         |
|---------------------|----------------------------------|-----------------------------------------------------------------------------------------------------------------------|--------------------------------------------------------------------------------------------------------------------------------------------------------------------------------------------------|---------------------------------------------------------------------------------------------------------------|-----------------------------------------------------------------------------------------|
|                     |                                  |                                                                                                                       | <p>specified schedule(s)</p> <p>Use certificates of warranty to confirm accuracy for disposables</p> <p>Include pipetting in analyst training and competency checks</p>                          | <p>certificate of warranty</p> <p>Analysts are properly trained in pipetting</p> <p>The company meets GMP</p> | <p>in sample preparation</p>                                                            |
| Pipettors with tips | <p>Accuracy</p> <p>Precision</p> | <p>Incorrect volumes used in media preparation, sample preparation, suspension/rehydration, dilution, and plating</p> | <p>Calibrate pipettors with tips before use to meet GMP</p> <p>Included pipetting in analyst training and competency checks</p>                                                                  | <p>The company meets GMP for pipettor calibration and analyst training</p>                                    | <p>Yes</p> <p>Different pipettors and tips are used during dilution and plating</p>     |
| Graduated cylinders | <p>Accuracy</p> <p>Precision</p> | <p>Incorrect volumes used in media, sample preparation, and/or suspension/rehydration</p>                             | <p>Ensure the cylinders are not damaged</p> <p>Schedule accuracy checks for cylinders that are used and/or sterilized frequently</p> <p>Train analysts to correctly read graduated cylinders</p> | <p>The company meets GMP for use of graduated cylinders</p>                                                   | <p>No</p> <p>The same set of graduated cylinders is used throughout the experiments</p> |

|                       |                       |                                                                                                                                                 |                                                                                                                                                                                                                                   |                                                                                      |    |
|-----------------------|-----------------------|-------------------------------------------------------------------------------------------------------------------------------------------------|-----------------------------------------------------------------------------------------------------------------------------------------------------------------------------------------------------------------------------------|--------------------------------------------------------------------------------------|----|
| Other equipment       | Accuracy<br>Precision | Depends upon laboratory procedures                                                                                                              | Depends upon laboratory procedures                                                                                                                                                                                                | No “other equipment” was required in the company procedure                           | No |
| Instability of sample | Accuracy<br>Precision | Over time and regardless of handling, storage, etc., the nature of the sample changes because microbial cells change throughout their lifecycle | Clear, detailed instruction from gathering sample (include during which part of life the test is made and/or consider when developing the measurand) to reporting result are documented to help control stability<br><br>Meet GMP | The company meets GMP as demonstrated by passing GMP audits                          | No |
| Storage of sample     | Accuracy<br>Precision | Must provide conditions to keep sample as stable as possible before and perhaps during/after use                                                | Control temperature and relative humidity<br><br>Specify acceptable temperature and relative humidity ranges<br><br>Meet GMP                                                                                                      | The company meets GMP and is attentive to the conditions that samples are exposed to | No |

|                                                |                       |                                                                                                      |                                                                                                                                                                               |                                                                         |                                                               |
|------------------------------------------------|-----------------------|------------------------------------------------------------------------------------------------------|-------------------------------------------------------------------------------------------------------------------------------------------------------------------------------|-------------------------------------------------------------------------|---------------------------------------------------------------|
| Preparation of test portions or test solutions | Accuracy<br>Precision | Impact on total CFU counts                                                                           | Provide detailed instructions on preparation (e.g., portion weights and volumes must be adequate)<br><br>Specify and control temperature and time for suspension and dilution | Clear, detailed instructions are included in the analytical procedure   | No                                                            |
| Homogenization of sample                       | Precision             | Must release cells from matrix but not kill them                                                     | Specify technique and/or equipment to be used such as mechanical blender, stomacher, vortex, hand maceration                                                                  | Specified in company's analytical procedure                             | No<br><br>Only one blender was used to homogenize all samples |
| Increased or decreased sample size             | Accuracy<br>Precision | Sample size affects standard error<br><br>Colony count will change and affect variance of mean count | Sample size to be standardized during procedure development<br><br>Analyst training includes weighing and measuring                                                           | Sample size is stated in procedure and analysts are trained to meet GMP | No                                                            |
| Hold times                                     | Accuracy<br>Precision | Suspension/rehydration, dilution, time until agar is added, incubation time, etc.                    | Specify all hold times                                                                                                                                                        | The company determined all hold time during procedure development       | No                                                            |



|                 |                       |                                                                                           |                                                                                                                                                                  |                                                                                                                                     |    |
|-----------------|-----------------------|-------------------------------------------------------------------------------------------|------------------------------------------------------------------------------------------------------------------------------------------------------------------|-------------------------------------------------------------------------------------------------------------------------------------|----|
|                 |                       | Determine whether plates can be held in refrigerator before counting and, if so, how long |                                                                                                                                                                  |                                                                                                                                     |    |
| Dilution        | Precision             | Uncertainty may depend upon dilution scheme                                               | Specify dilution scheme and/or instruct to record dilution scheme                                                                                                | Dilution scheme is specified                                                                                                        | No |
| Serial dilution | Accuracy<br>Precision | Aseptic technique is required to prevent cross contamination                              | Sterile consumables and a protected work area<br><br>Analysts trained in aseptic technique                                                                       | The company provides sterile consumables and a protected work environment<br><br>Analysts are trained in aseptic technique meet GMP | No |
| Heat shock      | Accuracy<br>Precision | Some spore forming bacteria need a heat shock to form colonies on counting medium         | Instructions for heat shock are detailed and clear<br><br>Instructions for heat shock include specific hold times and temperature(s)<br><br>Water bath meets GMP | Not relevant for <i>Lactobacillus</i> spp. example                                                                                  | No |

|                                        |                       |                                                                                                                                                                                |                                                                                                                                                                                            |                                                                                                                                                 |                                                                                                      |
|----------------------------------------|-----------------------|--------------------------------------------------------------------------------------------------------------------------------------------------------------------------------|--------------------------------------------------------------------------------------------------------------------------------------------------------------------------------------------|-------------------------------------------------------------------------------------------------------------------------------------------------|------------------------------------------------------------------------------------------------------|
| Pipetting technique                    | Precision<br>Accuracy | Many pipetting variables will affect uncertainty, e.g., mixing between transfers, vortex speed and time of mixing, use of fresh tips, washing the pipet or tip when dispensing | Training on proper pipetting<br><br>Specify pipettes or pipettors and tips<br><br>Standardize practices<br><br>Ensure calibrated pipettes and pipettors with tips are used<br><br>Meet GMP | The company has a pipetting training module for analysts pipetting and has detailed the techniques required for this procedure<br><br>Meets GMP | Yes<br><br>This is captured by using different analysts and various pipettes and pipettors with tips |
| Replications/plating designs           | Precision             | Single plate or multiple plate design - replication can impact precision                                                                                                       | Clearly describe in which steps replication occurs, e.g., specify the number of plates generated per dilution                                                                              | The company procedures state the use of a triplicate plating design                                                                             | No<br><br>The same plating design is used throughout                                                 |
| Incubators and incubation temperatures | Precision             | Incorrect incubation temperature impacts growth<br><br>The effect of temperature on CFU production may be strain independent<br><br>At “maximum load”, incubator temperature   | Incubators meet GMP requirements<br><br>Temperature ranges are specified for individual incubators                                                                                         | Temperature ranges have been specified for all incubators                                                                                       | Yes<br><br>Selected incubation temperatures ranges are not varied, but different incubators are used |

|                       |                                  |                                                                                                                                                                                            |                                                                                                                   |                                                                                                                   |                                                                                   |
|-----------------------|----------------------------------|--------------------------------------------------------------------------------------------------------------------------------------------------------------------------------------------|-------------------------------------------------------------------------------------------------------------------|-------------------------------------------------------------------------------------------------------------------|-----------------------------------------------------------------------------------|
|                       |                                  | <p>must remain within its specified range</p> <p>Heating and ventilation cycles are used to generate and maintain temperature ranges</p>                                                   |                                                                                                                   |                                                                                                                   |                                                                                   |
| Incubation time       | Accuracy                         | Time of incubation impacts the counts and may be strain dependent                                                                                                                          | Provide the specific time or time range of incubation                                                             | Incubation time ranges are specified                                                                              | <p>No</p> <p>Plates are removed from the incubator within the specified range</p> |
| Atmospheric modifiers | <p>Accuracy</p> <p>Precision</p> | <p>Atmospheric conditions (aerobic, anaerobic, microaerophilic) affect growth</p> <p>The use of different gas generating systems, including sachets, and indicators, can affect growth</p> | Specify whether a modified atmosphere is required for optimum growth and describe how to produce the condition(s) | Atmospheric conditions are included in the details of the procedure                                               | <p>No</p> <p>Conditions specified in the company procedure are followed</p>       |
| Volumes used          | Precision                        | Volumes effect the reportable value - transfer, dilution blank, test portion, poured agar, etc.                                                                                            | <p>Specific instructions</p> <p>Training programs</p> <p>Meet GMP</p>                                             | <p>Volumes and how to measure them are specified in the procedure</p> <p>Analyst training and quality control</p> | <p>No</p> <p>Volumes were not varied</p>                                          |

|                |           |                                                                                                                                                                                                                                                                                                        |                                                                                                                                                                                                                                                                                           |                                                             |                                                                                                                                                      |
|----------------|-----------|--------------------------------------------------------------------------------------------------------------------------------------------------------------------------------------------------------------------------------------------------------------------------------------------------------|-------------------------------------------------------------------------------------------------------------------------------------------------------------------------------------------------------------------------------------------------------------------------------------------|-------------------------------------------------------------|------------------------------------------------------------------------------------------------------------------------------------------------------|
|                |           | <p>The range of agar volume poured needs to be adequate for growth</p> <p>Hand-poured volumes can be estimated by height (a skill acquired through practice)</p> <p>Repeatability of filling and emptying measuring device</p> <p>Specifications of glassware and temperature effects on glassware</p> |                                                                                                                                                                                                                                                                                           | <p>programs meet GMP</p>                                    |                                                                                                                                                      |
| Counting error | Precision | <p>Counting of plates is critical - both manual and automatic counting are subject to error</p>                                                                                                                                                                                                        | <p>Ensure appropriate procedure development and qualification</p> <p>GMP training to include what/what not to count, range of counts, how to report counts (rounding, significant figures, Log transformation, digital and/or manual requirements), whether to adjust counts based on</p> | <p>The company provides extensive training for counting</p> | <p>Yes</p> <p>Although counting error was not specifically added in the data, the impact of the variable is captured by using different analysts</p> |

|                             |                                  |                                                                                            |                                                                                                                                                                                                                                                                                                                                                                                                                                                                 |                       |    |
|-----------------------------|----------------------------------|--------------------------------------------------------------------------------------------|-----------------------------------------------------------------------------------------------------------------------------------------------------------------------------------------------------------------------------------------------------------------------------------------------------------------------------------------------------------------------------------------------------------------------------------------------------------------|-----------------------|----|
|                             |                                  |                                                                                            | <p>confirmation, how to determine if all counts within counting range are equally good, what to do if CFUs do not look like 10x dilutions on the plates, etc.</p> <p>Qualification of counting instruments and/or tools</p> <p>Address personal uncertainty – adjust group or laboratory uncertainty based on an “expert counter within the group”; develop a second count scheme to be followed by control chart; consider using mean value as a reference</p> |                       |    |
| Environmental contamination | <p>Accuracy</p> <p>Precision</p> | Possible air contamination via laboratory/building ventilation, dock doors, lack of sample | Meet environmental requirements of GMP                                                                                                                                                                                                                                                                                                                                                                                                                          | The company meets GMP | No |

|                      |                                  |                                                                                                                                                                                   |                                                                                                                                                                                                                                                                           |                                  |    |
|----------------------|----------------------------------|-----------------------------------------------------------------------------------------------------------------------------------------------------------------------------------|---------------------------------------------------------------------------------------------------------------------------------------------------------------------------------------------------------------------------------------------------------------------------|----------------------------------|----|
|                      |                                  | <p>containment during preparation, etc.</p> <p>Inadequate cleaning and sanitation regimes for surfaces</p>                                                                        |                                                                                                                                                                                                                                                                           |                                  |    |
| Calculation          | <p>Accuracy</p> <p>Precision</p> | <p>Decide whether the exact product weight in a step should be used for the calculation</p> <p>Ensure calculations are correct</p>                                                | <p>Determine if exact volume impacts reportable value</p> <p>GMP/Training – counting (see above examples) and documentation; data review (include check of all steps in manual calculations; validate automatic counts as described in standard operating procedures)</p> | Included in analytical procedure | No |
| Microbial metabolism | <p>Accuracy</p> <p>Precision</p> | <p>Metabolic by-products that can cause competition between colonies – production of acid, antibiotics, other</p> <p>Note: These impacts or risks are often unpredictable and</p> | <p>Functioning quality assurance program</p> <p>Meets GMP</p> <p>Adequate level of expertise at bench</p>                                                                                                                                                                 | Meets GMP                        | No |

|                                          |                       |                                                                                                                                                                                                                                                                                                                                 |                                                                                                                                                                              |                                                                                                                                                                 |    |
|------------------------------------------|-----------------------|---------------------------------------------------------------------------------------------------------------------------------------------------------------------------------------------------------------------------------------------------------------------------------------------------------------------------------|------------------------------------------------------------------------------------------------------------------------------------------------------------------------------|-----------------------------------------------------------------------------------------------------------------------------------------------------------------|----|
|                                          |                       | cannot generally be corrected mathematically                                                                                                                                                                                                                                                                                    | Uncertainty does not include spurious errors and blunders                                                                                                                    |                                                                                                                                                                 |    |
| <b>ISO Risk Category: Distributional</b> |                       |                                                                                                                                                                                                                                                                                                                                 |                                                                                                                                                                              |                                                                                                                                                                 |    |
| Mixing steps                             | Precision<br>Accuracy | <p>Any mixing must be adequate</p> <p>For example, low counts may occur if agar swirling technique does not distribute cells evenly or result in spilling agar/sample over the edge of the plate or into the lid</p> <p>For example, variable counts may occur if test tubes are not uniformly vortexed to distribute cells</p> | <p>Provide descriptive written and verbal instructions</p> <p>Demonstrate and train techniques and use of equipment</p> <p>Use video recordings to illustrate techniques</p> | The company uses video enhanced training modules                                                                                                                | No |
| Distribution of microbes                 | Precision             | Lack of homogeneous distribution results in variable counts whether uneven distribution occurs in the decision unit (entire batch or lot), a laboratory sample (subsample of the decision unit) or the test portion                                                                                                             | <p>Distribution problems within the decision unit may be limited in powders but increase in finished products</p> <p>Homogeneity can be experimentally validated, but</p>    | <p>The company conducted studies to show the laboratory sample is adequately homogenous</p> <p>The company has written an SOP describing how to mix various</p> | No |

|                                                               |                                  |                                                                                                                                                                                                                                                   |                                                                                                                                                                                                                                                             |                                                                  |                                                                                         |
|---------------------------------------------------------------|----------------------------------|---------------------------------------------------------------------------------------------------------------------------------------------------------------------------------------------------------------------------------------------------|-------------------------------------------------------------------------------------------------------------------------------------------------------------------------------------------------------------------------------------------------------------|------------------------------------------------------------------|-----------------------------------------------------------------------------------------|
|                                                               |                                  |                                                                                                                                                                                                                                                   | <p>validation may not hold from batch to batch</p> <p>Sometimes increments are taken from like-product decision units and blended at the manufacturing level to create a primary sample</p> <p>Mixing/blending is sometimes used to improve homogeneity</p> | laboratory samples (including powders) and produce test portions |                                                                                         |
| <b>ISO Risk Category: Matrix</b>                              |                                  |                                                                                                                                                                                                                                                   |                                                                                                                                                                                                                                                             |                                                                  |                                                                                         |
| Laboratory sample matrix (inhibition or promotion or neutral) | <p>Accuracy</p> <p>Precision</p> | <p>The matrix is defined in the measurand and ATP</p> <p>The matrix can impact the medium pH, component solubility, viscosity, etc.</p> <p>The matrix can affect microbial cells within sample during storage and impact the analysis results</p> | <p>Control the procedure</p> <p>Any changes to the procedure can affect the matrix and vice versa</p>                                                                                                                                                       | The matrix is defined                                            | <p>No</p> <p>One laboratory sample is used for all test portions in the experiments</p> |



|                                                                                      |                       |                                                                                                                                                               |                                                                           |                                                               |    |
|--------------------------------------------------------------------------------------|-----------------------|---------------------------------------------------------------------------------------------------------------------------------------------------------------|---------------------------------------------------------------------------|---------------------------------------------------------------|----|
| Interaction of matrix and probiotic                                                  | Accuracy<br>Precision | Matrix may absorb, contain high concentrations of particles and/or solids which lower recovery<br><br>The matrix may be inhibitory                            | Matrix and maceration experimentation will define the extent of this risk | Studies have shown this is not an issue                       | No |
| Condition of microorganisms (viable and vital, sub-lethally damaged, non-culturable) | Accuracy<br>Precision | The matrix can impact the total counts of microorganisms                                                                                                      |                                                                           | Matrix has been shown to not impact <i>Lactobacillus spp.</i> | No |
| Effects of competitive organisms on the recovery of specific types                   | Accuracy<br>Precision | The matrix can impact the total counts of desired microorganism                                                                                               |                                                                           | Matrix does not include other organisms                       | No |
| <b>Other Uncertainty Components</b>                                                  |                       |                                                                                                                                                               |                                                                           |                                                               |    |
|                                                                                      |                       | The laboratory should consider if there are any unique steps in their procedure or unique properties of the decision unit matrix that could impact the result |                                                                           | No unique steps                                               | No |

<sup>a</sup>As defined in ISO 19036:2019 (ISO, 2019)
